# Supplementary material for: Conservation of the S10-spc-α Locus within Otherwise Highly Plastic Genomes Provides Phylogenetic Insight into the Genus Leptospira
Source: PLoS One. 2008 Jul 16;3(7):e2752. doi: 10.1371/journal.pone.0002752 (PMC2481283; doi:10.1371/journal.pone.0002752)
Supplement: Table S2 — All primers used for the S10-spc-α locus analysis. (0.09 MB DOC) [file pone.0002752.s003.doc]

**Table S2. All the primers used for the *S10-spc-α* locus analysis.**

| **Primer** | **Sequence** | **Primer** | **Sequence** |
| --- | --- | --- | --- |
| 191R | 5′ AACCTGACCGACAAGTTGTT 3′ | 740 F | 5′ CCAGAAGTTGTCCCAAGTA 3′ |
| 258 R | 5′ GTTTTCTTGCTTCACTTC 3′ | 743R | 5′ TGAGTCCGTGAGGTTTCT 3′ |
| 260 F | 5′ ATGGCGTTGGAAGTCTCG 3′ | 744R | 5′ TTTCTCGACCAGAAACTC 3′ |
| 277 R | 5′ TTCTACAATGACTCGGTCTCT 3′ | 745R | 5′ TCCGTAATTGACATTCTT 3′ |
| 300 R | 5′ CGATTGGATCTGACATACTC 3′ | 748 F | 5′ AATTATTACATCACGGAATC 3′ |
| 301 F | 5′ GGTCACTTTGCGCGGAGACT 3′ | 751R | 5′ TCGGTTGTCCCTTCTTCTA 3′ |
| 309 R | 5′ ATCTCCCACGGAAGCGTAA 3′ | 752 F | 5′ AGGATTGGGATAAACATTGA 3′ |
| 310 F | 5′ CGCGAAACTTCTTACTATT 3′ | 800 F | 5′ ATTCGGAATTGGTAATTCTC 3′ |
| 314 F | 5′ GTTTCTACTCCAGGAAGAC 3′ | 801 F | 5′ TCTGGTTCTTTGACCATTTA 3′ |
| 400 R | 5′ TGCCGTCAACTGTAATCG 3′ | 802 F | 5′ ACCGCCTCCTTCAACAATAC 3′ |
| 428 F | 5′ TTAAGAAGAACCGGACAACA 3′ | 2260F | 5′ CGAAGGACTTCTCGGAATGGTGGATC 3′ |
| 429 R | 5′ TCGGAAATCCGTCCAACAAA 3′ | 2261R | 5′ CCCGTAGAAATCTGAGGGATAGAAAG 3′ |
| 430 F | 5′ GGTTCGAGGGCGGCCAGA 3′ | 2262F | 5′ GTACGGAACCGTCATTCTTTGTGCG 3′ |
| 443 F | 5′ GGAATTGGTAACGGAATTTCT 3′ | 2263F | 5′ CGGAAGAAAAATGGTTCAGGCGAAAAGC 3′ |
| 444 R | 5′ AAGAGAAGTTCCACCGAATG 3′ | 2264F | 5′ ACGATCATTCAGTGGTTGTCTTC 3′ |
| 450 F | 5′ GAAACTTTATTGCTCATAGAC 3′ | 2265R | 5′ CTTTCTTCCTTCTTCCCCTTCTTTTTG 3′ |
| 458 F | 5′ AAGAAGATTGGATAATGTAG 3′ | 2266R | 5′ ACCATAGATTCAGGAAGTCTTCCGATG 3′ |
| 460 R | 5′ AGGATTAGCCTTCAATTGTC 3′ | 2267R | 5′ TCGCTACTGGAAGACAACCACTGAATG 3′ |
| 477 F | 5′ CGACAACTATCGGTAACT 3′ | 2313R | 5′ CCTGAGTTGGAACTCAAATCTAAG 3′ |
| 478 F | 5′ CGATCAGTGTCTCCAAGAGT 3′ | 2314R | 5′ TTCCGTACTGCAGAGGAACCTTTC 3′ |
| 479 R | 5′ AGAACGAACGGAAAGCTC 3′ | 2315R | 5′ GGAGGTCCCATGAAGATAATGTTC 3′ |
| 480 R | 5′ GGCTTCAAATCGGTAACA 3′ | 2316R | 5′ ACTGCCCATCCAGCCCATTCTTGAC 3′ |
| 501 F | 5′ ATTCTGAAGTCGGAATTT 3′ | 2317R | 5′ TCCTCTTTCGGTGATCTGTTCC 3′ |
| 502 R | 5′ AACTCAGCGAATGCACTT 3′ | 2321R | 5′ TCGGTGATCTGTTCTCCTAACC 3′ |
| 503 F | 5′ CCGGATCTTCATATCGCTAC 3′ | 2322F | 5′ CTGCCTGAGTCTATGGTTCAAC 3′ |
| 504 R | 5′ TTCAACTCTTGGAGACACT 3′ | 2326R | 5′ TCGATTGGCTTTTTGCTTGAACCATC 3′ |
| 507 R | 5′ CGTTACGTCCTCTGCAACT 3′ | 2327R | 5′ ATTACAGAAGCATTGATTAAACCTGGG 3′ |
| 605 F | 5′ CCTGAGAAGATCAATGTA 3′ | 2328F | 5′ TCCTTAACCGTTCTTTTGACTCAGG 3′ |
| 618 R | 5′ GGATTTGATATCTACGGATACTC 3′ | 2329R | 5′ GAACCATTTTTCTTCCGACCATTTG 3′ |
| 621 F | 5′ AAACGTGCATAACGTGGAAC 3′ | 2330F | 5′ CAAATGGTCGGAAGAAAAATGGTTCAG 3′ |
| 622 F | 5′ CGTTCCGCGTTCATTTCT 3′ | 191c F | 5′ AACAACTTGTCGGTCAGGTT 3′ |
| 624 F | 5′ GATACGAAGCGATTCAATTA 3′ | 301c R | 5′ AGTCTCCGCGCAAAGTGACC 3′ |
| 625 R | 5′ ACGGAAAGTTCTTGTAGG 3′ | 428c R | 5′ TGTTGTCCGGTTCTTCTTAA 3′ |
| 634 F | 5′ GGGCGGATCTATCAAATTAC 3′ | 430c R | 5′ TCTGGCCGCCCTCGAACC 3′ |
| 635 R | 5′ AAGTGTATCTAAAGCTTCCGC 3′ | 458c R | 5′ CTACATTATCCAATCTTCTT 3′ |
| 643 F | 5′ CACCCATAGTTACTGAGAA 3′ | 501c R | 5′ AAATTCCGACTTCAGAAT 3′ |
| 644 R | 5′ AGATCCTGGGATTTCTCA 3′ | 605c R | 5′ TACATTGATCTTCTCAGG 3′ |
| 647 F | 5′ ATAACTACCGTCCTCAGTTT 3′ | 621c R | 5′ GTTCCACGTTATGCACGTTT 3′ |
| 648 R | 5′ CGGATCCAATGGTTCTTC 3′ | 624c R | 5′ TAATTGAATCGCTTCGTATC 3′ |
| 651 F | 5′ ACGAAGGCATTTGATTCT 3′ | 743c F | 5′ AGAAACCTCACGGACTCA 3′ |
| 657 F | 5′ AACAATTGGTCACGTAGA 3′ | 803c R | 5′ CCTCCGGAGCCAGAGAGATAA 3′ |
| 659 F | 5′ GCCGTTGCTTATGACCAA 3′ | G1 R | 5′ CTGAATCGCTGTATAAAAGT 3′ |
| 660 R | 5′ CGTTTAAGTGAGGTTTAGA 3′ | G2 F | 5′ GGAAAACAAATGGTCGGAAG 3′ |
| 667 R | 5′ TTTGCAAGTGTAGTAGTAATTG 3′ | G2c R | 5′ CTTCCGACCATTTGTTTTCC 3′ |
| 706 R | 5′ AATGCTGATGTAATGGCTTCT 3′ | R1 F | 5′ GAAGCAGGGCTGGAGTTC 3′ |
| 729 R | 5′ TTCCTAAGACCGCTTCTA 3′ | R1c R | 5′ GAACTCCAGCCCTGCTTC 3′ |
| 732 F | 5′ CCGCTGAGGTGTATGTAT 3′ | SeqY II F | 5′ GAATTTCTCTTTTGATCTTCG 3′ |
| 735 F | 5′ GAATCTTTGCCCACATAGA 3′ | SeqY IV R | 5′ GAGTTAGAGCTCAAATCTAAG 3′ |
| 737 F | 5′ CAGTCCGTGGTGGAAGAT 3′ |  |  |

F sense

R antisense
